# Supplementary material for: Occurrence of Grapevine Leafroll-Associated Virus-3 (GLRaV-3), Complete Nucleotide Sequence and Cultivar Susceptibility to a GLRaV-3 Isolate from Shaanxi Province of China
Source: MDPI journal article supplement (doi:10.3390/horticulturae8010073), 2022-01-14
Supplement: s1 [file s1]

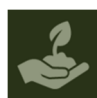

## Article

# Occurrence of Grapevine Leafroll-Associated Virus-3 (GLRaV-3), Complete Nucleotide Sequence and Cultivar Susceptibility to a GLRaV-3 Isolate from Shaanxi Province of China

Xinyi Hao, Bolei Jiao, Yunlei Wang, Boxing Shang and Yan Xu

Table S1. Fifty-nine complete genomes of GLRaV-3 worldwide.

| Isolate | GenBank accession# | Country      | <i>Vitis vinifera</i> Cultivar | Genome size | 5'UTR | 3'UTR | Reference              |
|---------|--------------------|--------------|--------------------------------|-------------|-------|-------|------------------------|
| 139     | JX266782           | Australia    | Sauvignon Blanc                | 18475       | 510   | 250   | Rast et al. (2012)     |
| TRAJ-BR | KX756669           | Brazil       | Trajadura                      | 18313       | 552   | 277   | Unpublished            |
| ISAB-BR | KX701860           | Brazil       | Isabel                         | 18020       | 255   | 281   | Unpublished            |
| TC-BR   | KX756668           | Brazil       | Tardia de Caxias               | 18498       | 737   | 277   | Unpublished            |
| NUB-BR  | MK804765           | Brazil       | BRS Nubia                      | 18498       | 737   | 277   | Unpublished            |
| 8415B   | KY073324           | Canada       | Riesling                       | 18563       | 672   | 350   | Unpublished            |
| 8415A   | KY073323           | Canada       | Riesling                       | 18572       | 736   | 303   | Unpublished            |
| Kat255b | MH521109           | Canada       | Katelin                        | 18126       | 376   | 361   | Unpublished            |
| Kat255  | MH521108           | Canada       | Katelin                        | 18498       | 737   | 277   | Unpublished            |
| 12G445  | MH814484           | Canada       | NS                             | 18502       | 848   | 281   | Unpublished            |
| 12G438  | MH814483           | Canada       | NS                             | 18574       | 737   | 353   | Unpublished            |
| 12G402  | MH814482           | Canada       | NS                             | 18580       | 738   | 358   | Unpublished            |
| Vdl     | MK032068           | Canada       | Vidal                          | 18599       | 737   | 229   | Diaz et al.(2018)      |
| CL-766  | EU344893           | Chile        | Merlot                         | 17919       | 158   | 277   | Engel et al. (2008)    |
| LN      | JQ423939           | China        | Venus Seedless                 | 18563       | 802   | 277   | Lyu et al. (2013)      |
| Sau     | MK988555           | China        | Cabernet Sauvignon             | 18026       | 255   | 280   | Unpublished            |
| VB-108  | MF991951           | Croatia      | Babica                         | 18377       | 778   | 139   | Voncina et al.(2018)   |
| Gor259  | MH521104           | France       | Goron de Bovernier             | 18346       | 585   | 277   | Unpublished            |
| Gre233  | MH521105           | Germany      | Green Veltliner                | 18456       | 534   | 236   | Unpublished            |
| Rod96   | KY707825           | Greece       | Roditis                        | 18478       | 737   | 362   | Unpublished            |
| Kis24   | MH521110           | Hungary      | Kishmish Vatkana               | 17488       | 282   | 14    | Unpublished            |
| NS      | KJ174518           | Israel       | NS                             | 18498       | 737   | 277   | Unpublished            |
| NdA121  | KY707826           | Italy        | Nero d'Avola                   | 18576       | 729   | 350   | Unpublished            |
| SL37-3  | KY821094           | Pakistan     | Italia                         | 18564       | 774   | 306   | Unpublished            |
| AK6     | KY821093           | Pakistan     | Sugra one                      | 18570       | 785   | 301   | Unpublished            |
| Tou260  | MH521119           | Portugal     | Touriga Franca                 | 18335       | 737   | 114   | Unpublished            |
| GP18    | EU259806           | South Africa | Cabernet Sauvignon             | 18498       | 737   | 277   | Maree et al. (2008)    |
| 623     | GQ352632           | South Africa | Ruby Cabernet                  | 18498       | 737   | 277   | Jooste et al. (2010)   |
| PL-20   | GQ352633           | South Africa | Cabernet Sauvignon             | 18433       | 672   | 277   | Jooste et al. (2010)   |
| 621     | GQ352631           | South Africa | Cabernet Sauvignon             | 18498       | 737   | 277   | Jooste et al. (2010)   |
| GH11    | JQ655295           | South Africa | Cabernet                       | 18671       | 737   | 264   | Bester et al. (2012a)  |
| GH24    | KM058745           | South Africa | Cabernet Sauvignon             | 18493       | 737   | 259   | Bester et al. (2014)   |
| GH30    | JQ655296           | South Africa | Cabernet                       | 18576       | 642   | 264   | Bester et al. (2012a)  |
| AU173   | MH521088           | Spain        | AU 33-057                      | 17768       | 552   | 24    | Unpublished            |
| BHA172  | MH521089           | Spain        | BHAU 19-010                    | 18276       | 515   | 277   | Unpublished            |
| NY-1    | NC_004667          | USA          | Pinot Noir                     | 17919       | 158   | 277   | Ling et al. (2004)     |
| WA-MR   | GU983863           | USA          | Merlot                         | 18498       | 737   | 277   | Jarugula et al. (2010) |
| CA7246  | JQ796828           | USA          | Merlot                         | 18552       | 737   | 274   | Seah et al. (2014)     |
| Pro95   | KY707824           | USA          | 11184                          | 18318       | 737   | 202   | Unpublished            |
| Pin249  | MH521118           | USA          | Pinot noir 1A4                 | 17920       | 162   | 274   | Unpublished            |
| Pin244b | MH521117           | USA          | Pinot Noir                     | 18477       | 737   | 361   | Unpublished            |
| Pin244  | MH521116           | USA          | Pinot Noir                     | 18497       | 737   | 276   | Unpublished            |

---

|        |          |     |                    |       |     |     |                     |
|--------|----------|-----|--------------------|-------|-----|-----|---------------------|
| Mer240 | MH521115 | USA | Merlot             | 18497 | 737 | 276 | Unpublished         |
| Mar239 | MH521114 | USA | Marzemino          | 18398 | 469 | 263 | Unpublished         |
| LN3204 | MH521112 | USA | LN33               | 18498 | 737 | 277 | Unpublished         |
| Ita219 | MH521107 | USA | Italia             | 18335 | 737 | 114 | Unpublished         |
| Ita218 | MH521106 | USA | Italia             | 18335 | 737 | 114 | Unpublished         |
| 185    | MH521102 | USA | Vitis vinifera     | 18305 | 544 | 277 | Unpublished         |
| Cha138 | MH521095 | USA | Chardonnay         | 18619 | 672 | 290 | Unpublished         |
| Cha137 | MH521094 | USA | Chardonnay         | 18619 | 672 | 290 | Unpublished         |
| Cha106 | MH521093 | USA | Chardonnay         | 18497 | 737 | 276 | Unpublished         |
| Cab248 | MH521091 | USA | Cabernet Sauvignon | 18475 | 737 | 359 | Unpublished         |
| LR101  | KY886362 | USA | NS                 | 18437 | 676 | 277 | Prator et al.(2017) |
| ID45   | MH796136 | USA | Cabernet sauvignon | 18478 | 737 | 362 | Unpublished         |
| ID46   | MH796135 | USA | Cabernet sauvignon | 18498 | 737 | 277 | Unpublished         |
| Mal162 | MH521113 | USA | Malbec             | 16114 | NS  | 241 | Unpublished         |
| Trc138 | KY764333 | USA | Chardonnay         | 18449 | 738 | 332 | Unpublished         |
| Trc139 | KY764332 | USA | Chardonnay         | 18483 | 672 | 154 | Unpublished         |
| Bla223 | MH521090 | USA | Black<br>Muscat    | 18493 | 732 | 277 | Unpublished         |

---
